# Supplementary material for: Cation/macromolecule interaction in alkaline cellulose solution characterized with pulsed field-gradient spin-echo NMR spectroscopy
Source: Royal Society of Chemistry journal article supplement (doi:10.1039/c6cp08744b), 2017-01-01
Supplement: c6cp08744b1.pdf [file c6cp08744b1.pdf]

## Supporting Information

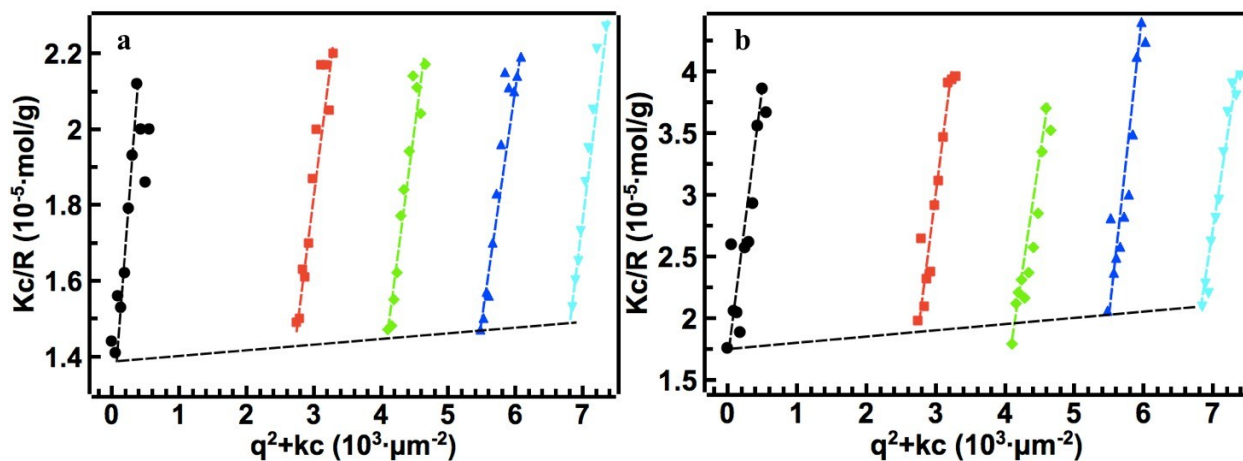

**Figure S1** Zimm plots of cellulose solution dissolved in NaOH (a) and LiOH (b) aqueous solutions.

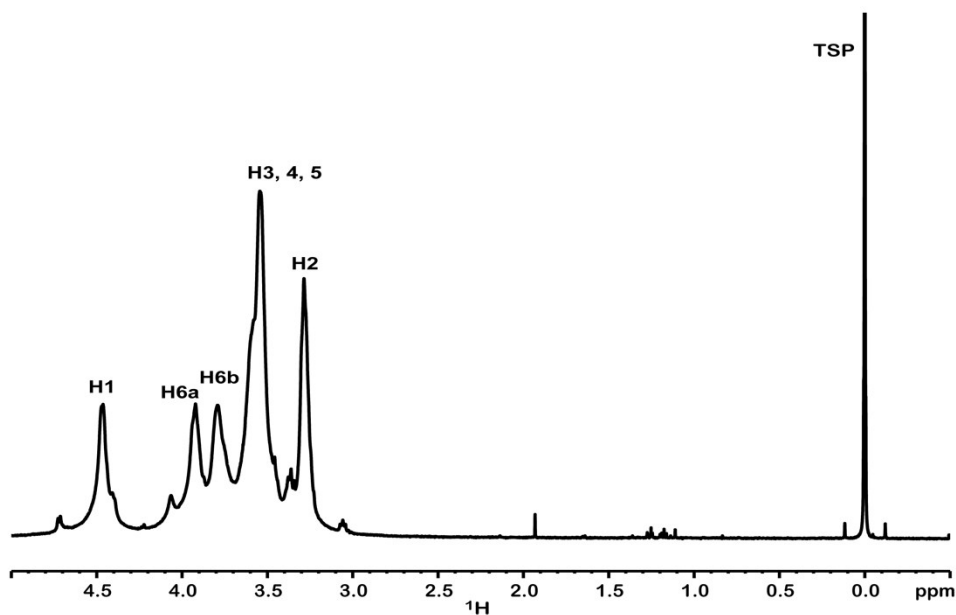

**Figure S2**  $^1\text{H}$  NMR spectrum of 2 wt% cellulose in NaOH solution, with the peak of TSP was calibrated to 0 ppm as reference.

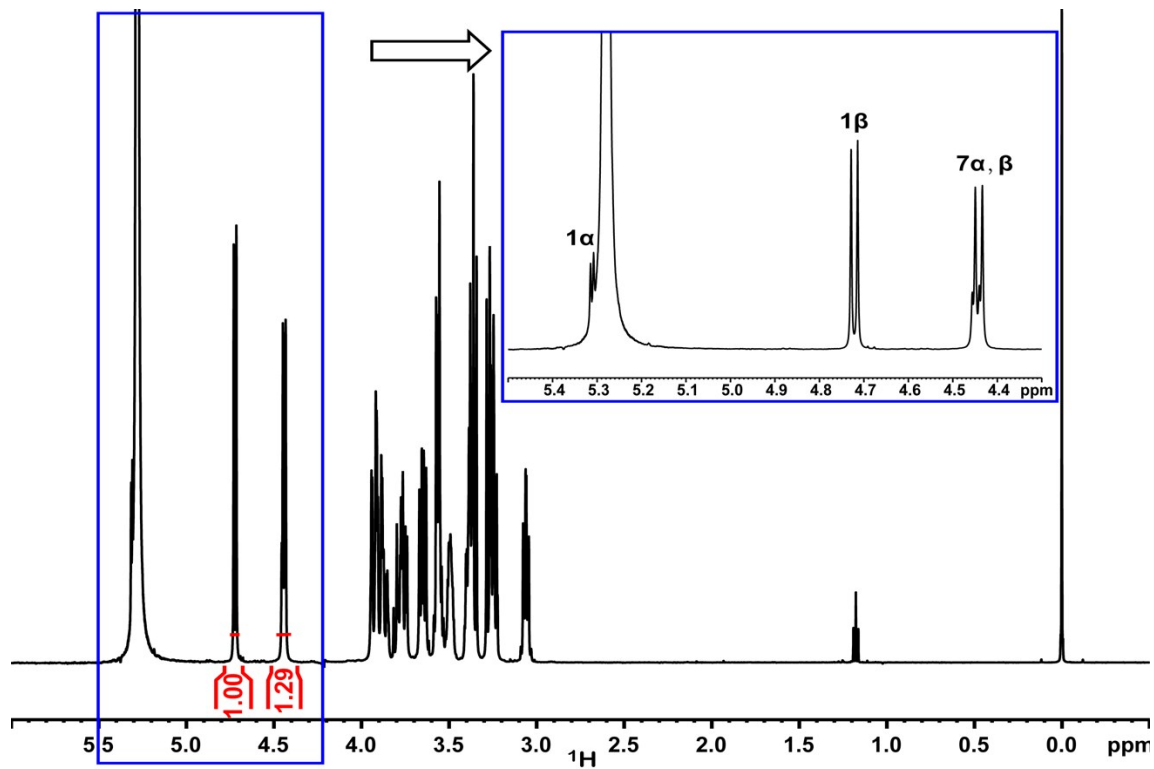

**Figure S3**  $^1\text{H}$  NMR spectrum and the integrals and assignment of anomeric hydrogens of cellobiose in NaOH solution, with the peak of TSP was calibrated to 0 ppm as reference.

**Table S1** Experimental results of  $M_{w,app}$ ,  $A_2$ , and  $M_{w,agg}$  of cellulose solution dissolved in NaOH and LiOH aqueous solution.

|      | $A_{sin}/A_{agg}$ | $M_{w,app}(\times 10^{-4})$<br>(g/mol) | $A_2(\times 10^7)$<br>(mol·dm <sup>3</sup> ·g <sup>-2</sup> ) | $M_{w,agg}(\times 10^{-4})$<br>(g/mol) |
|------|-------------------|----------------------------------------|---------------------------------------------------------------|----------------------------------------|
| NaOH | 0.5688            | 6.933                                  | 3.348                                                         | 27.26                                  |
| LiOH | 0.5296            | 5.670                                  | 15.46                                                         | 10.73                                  |

**Table S2** Diffusion coefficients( $D \cdot 10^{10}(\text{m}^2/\text{s})$ ) of  $\text{H}_2\text{O}$ ,  $\text{Li}^+$ ,  $\text{Na}^+$  and cellulose in the solution of  $\text{LiOH}$  and  $\text{NaOH}$  with variable content of cellulose. Every set of experiments was repeated three times.

| Cellulose (%) | LiOH-Cellulose- $\text{H}_2\text{O}$ |       |       |       | NaOH-Cellulose- $\text{H}_2\text{O}$ |       |       |       |
|---------------|--------------------------------------|-------|-------|-------|--------------------------------------|-------|-------|-------|
|               | 0                                    | 0.5   | 1.0   | 2.0   | 0                                    | 0.5   | 1.0   | 2.0   |
|               | $\text{Li}^+$                        |       |       |       | $\text{Na}^+$                        |       |       |       |
| 1             | 2.363                                | 2.234 | 2.176 | 2.089 | 3.611                                | 3.590 | 3.518 | 3.420 |
| 2             | 2.361                                | 2.232 | 2.178 | 2.097 | 3.610                                | 3.580 | 3.515 | 3.413 |
| 3             | 2.356                                | 2.233 | 2.176 | 2.091 | 3.613                                | 3.581 | 3.497 | 3.389 |
| Mean          | 2.360                                | 2.233 | 2.177 | 2.092 | 3.611                                | 3.584 | 3.510 | 3.407 |
| Std. error    | 0.004                                | 0.001 | 0.001 | 0.004 | 0.002                                | 0.006 | 0.011 | 0.016 |
|               | Cellulose                            |       |       |       |                                      |       |       |       |
| 1             | -                                    | 0.144 | 0.110 | 0.091 | -                                    | 0.129 | 0.106 | 0.107 |
| 2             | -                                    | 0.136 | 0.103 | 0.085 | -                                    | 0.119 | 0.102 | 0.100 |
| 3             | -                                    | 0.129 | 0.096 | 0.081 | -                                    | 0.110 | 0.095 | 0.095 |
| Mean          | -                                    | 0.136 | 0.103 | 0.086 | -                                    | 0.119 | 0.101 | 0.101 |
| Std. error    | -                                    | 0.007 | 0.007 | 0.005 | -                                    | 0.009 | 0.006 | 0.006 |
|               | $\text{H}_2\text{O}$                 |       |       |       |                                      |       |       |       |
| 1             | 5.951                                | 5.791 | 5.699 | 5.573 | 6.581                                | 6.580 | 6.428 | 6.234 |
| 2             | 5.944                                | 5.809 | 5.697 | 5.591 | 6.580                                | 6.553 | 6.426 | 6.283 |
| 3             | 5.959                                | 5.795 | 5.703 | 5.567 | 6.560                                | 6.560 | 6.432 | 6.271 |
| Mean          | 5.951                                | 5.798 | 5.700 | 5.577 | 6.574                                | 6.564 | 6.429 | 6.263 |
| Std. error    | 0.008                                | 0.009 | 0.003 | 0.012 | 0.012                                | 0.014 | 0.003 | 0.026 |

**Table S3** Fraction of free and bound cations in the solution of different concentration of cellulose.

| Cellulose (%) | P <sub>f</sub> (Na <sup>+</sup> ) (%) | P <sub>f</sub> (Li <sup>+</sup> ) (%) | P <sub>b</sub> (Na <sup>+</sup> ) (%) | P <sub>b</sub> (Li <sup>+</sup> ) (%) |
|---------------|---------------------------------------|---------------------------------------|---------------------------------------|---------------------------------------|
| 0.5           | 99.35                                 | 97.12                                 | 0.65                                  | 2.88                                  |
| 1             | 99.37                                 | 96.30                                 | 0.63                                  | 3.70                                  |
| 2             | 99.01                                 | 94.61                                 | 0.99                                  | 5.39                                  |

### Experimental notes

‡ Cellulose (DP=180) (From Alfa Aesar and the purity of 98+%) was dissolved in 1.75M NaOH (LiOH) aqueous solution at 0°C with stirring for 2 minutes. The dynamic and static light scattering experiments were made with a commercial light scattering spectrometer (ALV/SP-125,ALV, Germany) equipped with an ALV-5000/Ecorrelator and a He-Ne laser (at 632.8nm). For a polymer mixture of individual chains and multi-chainaggregates, the area ratio of these two modes ( $A_{sin}/A_{agg}$ ) could be expressed by:

$$\frac{A_{sin}}{A_{agg}} = \frac{M_{w,sin}X_{sin}}{M_{w,agg}X_{agg}} \quad (4)$$

where  $X_{sin}$  and  $X_{agg}$  are the weight fractions of individual chains and multi-chain aggregates, respectively and their sum equals to 1. In the static light scattering,

$$M_{w,app} = M_{w,sin}X_{sin} + M_{w,agg}X_{agg} \quad (5)$$

On the basis of equations (4) and (5) we could obtain the  $M_{w,agg}$ , which reflected the dissolving capacity of the solvent on cellulose.

$^7\text{Li}$  and  $^{23}\text{Na}$  NMR spectra of the solution were recorded on a Bruker AVANCE III 500 NMR spectrometer with BBO probe at 273 K. The pulse program developed in literature<sup>1</sup> was used to quantitatively investigate the interaction of ions ( $\text{Li}^+$  and  $\text{Na}^+$ ) with macromolecule (cellulose) in the solution. Diffusion coefficients were extracted from nonlinear least squares of the integrated resonance intensity as a function of the gradient amplitude. Every set of experiments was repeated three times to access the reliable standard error and coefficient of variation. The resonance intensity of these integrals,  $I$ , and the diffusion coefficient,  $D$ , are related according to the following equation:

$$I = I_0 \exp \left[ -D \left( \Delta - \frac{1}{3}\delta - \frac{1}{2}\tau \right) g^2 \gamma^2 \delta^2 \right] \quad (6)$$

Where  $I$  is the resonance intensity measure with pulse sequence,  $I_0$  is the intensity of the resonance in the absence of a gradient pulse,  $D$  is the self-diffusion coefficient,  $\Delta$  is the diffusion delay time, which defines the diffusional time scale,  $\gamma$  is the gyromagnetic ratio. The parameters  $\delta$  and  $g$  are the duration and strength of the gradient pulses, respectively. In addition,  $\tau$  is the delay between the positive and negative gradient pulse. Because the  $\gamma$  for  $^{23}\text{Na}$  and  $^7\text{Li}$  is small, in order to get enough attenuation of signal intensity,  $\Delta$  and  $\delta$  equal 30 ms, 12 ms (for mass fraction of cellulose 0%, 0.5%, 1%) or 14 ms (for mass fraction of

cellulose 2 %) for  $^{23}\text{Na}$  NMR experiments and 80 ms, 7.6 ms (for mass fraction of cellulose 0%, 0.5%, 1%) or 8 ms (for mass fraction of cellulose 2 %) for  $^7\text{Li}$  NMR experiments, respectively. For  $^{23}\text{Na}$  NMR experiments, 128 transients were acquired into 4 K data points over a spectral width of 2645.5 Hz, with a recycle delay of 0.78 s, and 6 ms or 7 ms (half of  $\delta$ ) SMSQ10.100-shaped gradients with strength in the range 1.083 - 53.073 G/cm in steps of 3.466 G/cm were used. For  $^7\text{Li}$  NMR experiments, 8 transients were acquired into 8 K data points over a spectral width of 1943 Hz, with a recycle delay of 3.1 s, and 3.8 ms or 4 ms (half of  $\delta$ ) SMSQ10.100-shaped gradients with strength in the range 1.083 - 53.073 G/cm in steps of 3.466 G/cm were used.

To obtain the diffusion coefficients for water and cellulose,  $^1\text{H}$  PFG-SE NMR experiments were also carried out. In  $^1\text{H}$  NMR experiments for water diffusion coefficient, 8 transients were acquired into 16 K data points over a spectral width of 5000 Hz, with a recycle delay of 6.6 s and a diffusion time of 40 ms, and 1.3 ms (SMSQ10.100-shaped gradients with strength in the range 1.083 - 53.073 G/cm in steps of 3.466 G/cm were used. In  $^1\text{H}$  NMR experiments for diffusion coefficient of cellulose, 32 transients were acquired into 16 K data points over a spectral width of 5000 Hz, with a recycle delay of 6.6 s and a diffusion time of 200 ms, and 4.0 ms (SMSQ10.100-shaped gradients with strength in the range 1.083 - 53.073 G/cm in steps of 3.466 G/cm were used.

## Reference

1D. H. Wu, A. D. Chen and C. S. Johnson, *J. Magn. Reson. A*, 1995, **115**, 260–264.
